# Supplementary material for: HLA-B*44 Is Associated with Dengue Severity Caused by DENV-3 in a Brazilian Population
Source: Hindawi journal article supplement (doi:10.1155/2013/648475), 2013-01-01
Supplement: f1 [file 648475.f1.pdf]

## Supplemental Material

### S1. Demographic, clinical data and HLA typing for all patients infected with dengue virus.

| Patient ID | Age | Sex | Type of Infection | Clinical Diagnosis | Human Leukocyte Antigen (HLA) |     |    |     |    |     |       |        |       |        |
|------------|-----|-----|-------------------|--------------------|-------------------------------|-----|----|-----|----|-----|-------|--------|-------|--------|
|            |     |     |                   |                    | A*                            | AA* | B* | BB* | C* | CC* | DRB1* | DDRB1* | DQB1* | DDQB1* |
| P083       | 36  | M   | Sec               | DF                 | 2                             | 24  | 8  | 15  | ND | ND  | 13    | 15     | 6     | 0      |
| P086       | 36  | F   | Prim              | DF                 | 1                             | 26  | 40 | 58  | 3  | 7   | 11    | 13     | 3     | 6      |
| P087       | 23  | M   | Sec               | DF                 | 23                            | 24  | 40 | 51  | 2  | 14  | 8     | 11     | 3     | 4      |
| P094       | 28  | F   | Prim              | DHF                | 24                            | ND  | 14 | ND  | 2  | 8   | 1     | 10     | 5     | ND     |
| P099       | 35  | M   | Sec               | DF                 | 2                             | 23  | 44 | 48  | 4  | 0   | 4     | 7      | 2     | 3      |
| P102       | 21  | F   | Prim              | DHF                | 1                             | 74  | 7  | 57  | 6  | 7   | 7     | 15     | 2     | 6      |
| P104       | 66  | F   | Sec               | DHF                | 24                            | 34  | 14 | 27  | 1  | 8   | 3     | 4      | 2     | 3      |
| P108       | 40  | M   | Sec               | DF                 | 1                             | 24  | 35 | 44  | 4  | 0   | 4     | 15     | 3     | 6      |
| P111       | 21  | F   | Prim              | DHF                | 2                             | 23  | 35 | 44  | 2  | 4   | 8     | 13     | 4     | 6      |
| P113       | 27  | M   | Sec               | DF                 | 24                            | 29  | 14 | 44  | 2  | 16  | 1     | 7      | 2     | 5      |
| P114       | 31  | M   | Prim              | DF                 | 1                             | 3   | 14 | 51  | 8  | 15  | 4     | 0      | 3     | 0      |
| P117       | 44  | F   | Sec               | DF                 | 23                            | 31  | 8  | 40  | 3  | 0   | 1     | 4      | 3     | 5      |
| P119       | 68  | M   | Sec               | DF                 | 2                             | 31  | 40 | 44  | 3  | 16  | 4     | 0      | 3     | 0      |
| P125       | 84  | F   | Sec               | DHF                | 2                             | 23  | 7  | 49  | 7  | 0   | 8     | 13     | 3     | 6      |
| P126       | 14  | M   | Sec               | DF                 | 2                             | 30  | ND | ND  | 6  | 17  | 4     | 11     | 3     | 5      |
| P127       | 48  | F   | Prim              | DF                 | 2                             | 32  | 15 | 40  | 3  | 5   | 4     | 10     | 3     | 5      |
| P128       | 26  | F   | Prim              | DHF                | 3                             | 32  | 37 | 40  | 2  | 6   | 10    | 13     | 5     | 6      |
| P129       | 29  | F   | Sec               | DF                 | 1                             | 3   | 35 | 58  | 4  | 6   | 11    | 0      | 3     | 6      |
| P130       | 18  | M   | Sec               | DF                 | ND                            | ND  | 37 | 40  | 2  | 6   | 10    | 13     | 5     | 6      |
| P132       | 27  | F   | Prim              | DF                 | 2                             | 0   | 14 | 15  | 3  | 8   | 7     | 8      | 2     | 4      |
| P135       | 34  | M   | Sec               | DF                 | 2                             | 3   | 38 | 51  | 12 | 16  | 7     | 16     | 3     | 5      |
| P136       | 27  | F   | Prim              | DF                 | 2                             | 68  | 15 | 53  | 2  | 4   | 1     | 7      | 2     | 0      |
| P145       | 19  | M   | Prim              | DHF                | 3                             | 66  | 35 | 58  | 4  | 7   | 13    | 15     | 6     | 0      |
| P155       | 26  | F   | Sec               | DF                 | 2                             | 23  | 45 | 58  | 6  | 0   | 1     | 15     | 5     | 6      |
| P187       | 35  | F   | Sec               | DF                 | 2                             | 26  | 7  | 38  | 7  | 12  | 3     | 15     | 2     | 6      |

**S1. Cont.**

| Patient ID | Age | Sex | Type of Infection | Clinical Diagnosis | Human Leukocyte Antigen (HLA) |     |    |     |    |     |       |        |       |        |
|------------|-----|-----|-------------------|--------------------|-------------------------------|-----|----|-----|----|-----|-------|--------|-------|--------|
|            |     |     |                   |                    | A*                            | AA* | B* | BB* | C* | CC* | DRB1* | DDRB1* | DQB1* | DDQB1* |
| P189       | 37  | M   | Sec               | DF                 | 30                            | 68  | 35 | 53  | ND | ND  | 8     | 11     | 4     | 6      |
| P193       | 68  | F   | Sec               | DHF                | 3                             | 11  | 44 | 58  | 5  | 6   | 3     | 4      | 3     | 4      |
| P198       | 43  | M   | Sec               | DF                 | 3                             | 68  | 7  | 18  | 7  | 8   | 11    | 15     | 3     | 6      |
| P201       | 60  | F   | Sec               | DF                 | 11                            | 68  | 51 | 52  | 4  | 12  | 4     | 0      | 3     | 0      |
| P203       | 26  | F   | Sec               | DHF                | 11                            | 0   | 39 | 52  | 3  | 12  | 4     | 8      | 3     | 4      |
| P204       | 29  | M   | Sec               | DF                 | 23                            | 33  | 14 | 18  | 8  | 0   | 7     | 13     | 2     | 6      |
| P205       | 30  | M   | Prim              | DF                 | 24                            | 68  | 7  | 15  | 7  | 0   | 3     | 4      | 2     | 3      |
| P206       | 36  | M   | Sec               | DHF                | 2                             | 24  | 27 | 35  | 1  | 4   | 1     | 11     | 3     | 5      |
| P210       | 20  | F   | Prim              | DF                 | 23                            | 29  | 44 | 49  | 7  | 16  | 13    | 15     | 6     | 0      |
| P215       | 52  | F   | Prim              | DF                 | 24                            | 33  | 8  | 44  | 2  | 7   | 3     | 13     | 2     | 6      |
| P220       | 18  | F   | Sec               | DF                 | 2                             | 30  | 8  | 18  | 7  | 0   | 3     | 11     | 2     | 3      |
| P224       | 34  | F   | Prim              | DF                 | 2                             | 29  | 7  | 44  | 7  | 16  | 1     | 15     | 5     | 6      |
| P226       | 4   | M   | Prim              | DF                 | 2                             | 0   | 7  | 51  | 7  | 15  | 1     | 11     | 3     | 5      |
| P235       | 35  | F   | Sec               | DF                 | 2                             | 3   | 35 | 51  | 4  | 16  | 13    | 0      | 6     | 0      |
| P241       | 40  | F   | Sec               | DF                 | 2                             | 26  | 7  | 49  | 7  | 0   | 9     | 10     | 2     | 5      |
| P246       | 31  | M   | Prim              | DF                 | 24                            | 0   | 8  | 14  | 7  | 8   | 3     | 0      | 2     | 0      |
| P248       | 45  | F   | Sec               | DF                 | 2                             | 0   | 35 | 40  | 3  | 4   | ND    | ND     | 3     | 5      |
| P249       | 43  | M   | Prim              | DF                 | 11                            | 30  | 18 | 35  | 4  | 5   | 3     | 4      | 2     | 3      |
| P250       | 12  | F   | Prim              | DF                 | 2                             | 30  | 18 | 35  | 4  | 5   | 3     | 13     | 2     | 5      |
| P255       | 48  | M   | Sec               | DF                 | 2                             | 31  | 15 | 40  | 2  | 3   | 1     | 4      | 3     | 5      |
| P256       | 57  | F   | Sec               | DF                 | 2                             | 32  | 40 | 44  | 3  | 16  | 13    | 15     | 6     | 0      |
| P259       | 30  | F   | Prim              | DF                 | 29                            | 68  | 15 | 35  | 2  | 4   | 1     | 12     | 5     | 0      |
| P260       | 44  | F   | Prim              | DHF                | 3                             | 68  | 7  | 53  | 4  | 7   | 13    | 15     | 6     | 0      |
| P263       | 25  | F   | Prim              | DF                 | 3                             | 74  | 51 | 81  | 8  | 15  | 12    | 15     | 5     | 6      |
| P265       | 36  | F   | Prim              | DF                 | 1                             | 68  | 15 | 48  | 4  | 7   | 13    | 14     | 3     | 6      |

**S1. Cont.**

| Patient ID | Age | Sex | Type of Infection | Clinical Diagnosis | Human Leukocyte Antigen (HLA) |     |    |     |    |     |       |        |       |        |
|------------|-----|-----|-------------------|--------------------|-------------------------------|-----|----|-----|----|-----|-------|--------|-------|--------|
|            |     |     |                   |                    | A*                            | AA* | B* | BB* | C* | CC* | DRB1* | DDRB1* | DQB1* | DDQB1* |
| P266       | 48  | M   | Sec               | DF                 | 2                             | 26  | 18 | 51  | 7  | 14  | 1     | 16     | 5     | 0      |
| P267       | 33  | M   | Prim              | DF                 | 2                             | 33  | 14 | 18  | 5  | 8   | 1     | 10     | 5     | 0      |
| P270       | 23  | M   | Sec               | DF                 | 29                            | 68  | 39 | 44  | 7  | 16  | 4     | 7      | 2     | 3      |
| P275       | 57  | F   | Prim              | DF                 | 1                             | 33  | 8  | 14  | 7  | 8   | 7     | 0      | 3     | 6      |
| P276       | 45  | M   | Sec               | DF                 | 1                             | 24  | 51 | 57  | 2  | 7   | 7     | 16     | 3     | 5      |
| P277       | 41  | M   | Sec               | DHF                | 30                            | 74  | 42 | 0   | 7  | 17  | 8     | 15     | 3     | 6      |
| P278       | 76  | F   | Sec               | DF                 | 2                             | 26  | 8  | 51  | 7  | 14  | 7     | 11     | 2     | 6      |
| P279       | 17  | F   | Prim              | DF                 | 2                             | 68  | 7  | 35  | 4  | 7   | 13    | 16     | 6     | 0      |
| P281       | 35  | F   | Sec               | DF                 | 24                            | 33  | 14 | 18  | 8  | 12  | 1     | 11     | 3     | 5      |
| P282       | 22  | F   | Prim              | DF                 | 23                            | 68  | 51 | 53  | 6  | 16  | 7     | 13     | 2     | 6      |
| P284       | 36  | M   | Sec               | DF                 | 3                             | 24  | 15 | 35  | 3  | 4   | 3     | 8      | 2     | 4      |
| P285       | 45  | M   | Sec               | DF                 | 3                             | 26  | 35 | 51  | 2  | 4   | 7     | 11     | 2     | 3      |
| P286       | 49  | F   | Sec               | DF                 | 33                            | 68  | 14 | 53  | 4  | 8   | 9     | 13     | 6     | 0      |
| P289       | 25  | F   | Prim              | DF                 | 1                             | 3   | 7  | 35  | 3  | 15  | 7     | 15     | 2     | 5      |
| P291       | 66  | F   | Sec               | DF                 | 24                            | 31  | 40 | 45  | 3  | 15  | 4     | 13     | 3     | 0      |
| P292       | 25  | M   | Prim              | DF                 | 26                            | 68  | 14 | 53  | 4  | 8   | 4     | 13     | 4     | 6      |
| P294       | 15  | F   | Prim              | DF                 | 24                            | 31  | 40 | 52  | 3  | 15  | 4     | 8      | 3     | 4      |
| P295       | 18  | M   | Prim              | DF                 | 2                             | 11  | 18 | 35  | 4  | 7   | 11    | 15     | 3     | 5      |
| P297       | 18  | M   | Prim              | DF                 | 33                            | 68  | 35 | 44  | 4  | 5   | 13    | 15     | 6     | 0      |
| P298       | 22  | M   | Sec               | DF                 | 2                             | 68  | 44 | 57  | 5  | 12  | 7     | 15     | 3     | 6      |
| P299       | 56  | M   | Prim              | DF                 | 1                             | 24  | 37 | 51  | 6  | 15  | 10    | 15     | 5     | 6      |
| P300       | 17  | M   | Prim              | DF                 | 11                            | 36  | 35 | 53  | 4  | 0   | 7     | 14     | 2     | 5      |
| P301       | 30  | F   | Sec               | DF                 | 2                             | 23  | 14 | 41  | 2  | 17  | 1     | 4      | 3     | 5      |
| P305       | 35  | M   | Prim              | DHF                | 2                             | 24  | 7  | 35  | 4  | 7   | 15    | 0      | 6     | 0      |
| P306       | 47  | F   | Sec               | DF                 | 1                             | 2   | 41 | 51  | 14 | 17  | 3     | 0      | 2     | 0      |

**S1. Cont.**

| Patient ID | Age | Sex | Type of Infection | Clinical Diagnosis | Human Leukocyte Antigen (HLA) |     |    |     |    |     |       |        |       |        |
|------------|-----|-----|-------------------|--------------------|-------------------------------|-----|----|-----|----|-----|-------|--------|-------|--------|
|            |     |     |                   |                    | A*                            | AA* | B* | BB* | C* | CC* | DRB1* | DDRB1* | DQB1* | DDQB1* |
| P307       | 41  | F   | Prim              | DHF                | 2                             | 24  | 7  | 15  | 7  | 14  | 11    | 14     | 3     | 0      |
| P308       | 42  | M   | Sec               | DF                 | 23                            | 33  | 13 | 41  | 6  | 17  | 7     | 0      | 2     | 0      |
| P310       | 30  | F   | Sec               | DF                 | 3                             | 74  | 15 | 35  | 4  | 5   | 13    | 15     | 6     | 0      |
| P311       | 33  | M   | Sec               | DF                 | 2                             | 24  | 44 | 57  | 4  | 6   | 3     | 14     | 2     | 5      |
| P314       | 31  | F   | Sec               | DF                 | 1                             | 2   | 52 | 57  | 7  | 15  | 4     | 13     | 3     | 6      |
| P316       | 31  | F   | Sec               | DF                 | 2                             | 30  | 18 | 35  | 4  | 5   | 1     | 3      | 2     | 5      |
| P319       | 40  | M   | Prim              | DF                 | 2                             | 11  | 13 | 15  | 6  | 14  | 7     | 14     | 2     | 3      |
| P320       | 49  | F   | Sec               | DF                 | 2                             | 30  | 13 | 0   | 6  | 0   | 7     | 0      | 2     | 0      |
| P322       | 48  | M   | Sec               | DF                 | 2                             | 3   | 7  | 58  | 6  | 7   | 7     | 15     | 2     | 6      |
| P329       | 47  | M   | Sec               | DF                 | 3                             | 24  | 8  | 49  | 7  | 0   | 3     | 13     | 2     | 3      |
| P330       | 40  | F   | Sec               | DF                 | 2                             | 74  | 39 | 57  | 2  | 12  | 1     | 0      | 5     | 0      |
| P331       | 45  | M   | Sec               | DF                 | 11                            | 68  | 27 | 53  | 2  | 4   | 9     | 11     | 3     | 0      |
| P332       | 34  | F   | Sec               | DF                 | 2                             | 11  | 7  | 44  | 5  | 7   | 8     | 12     | 3     | 4      |
| P339       | 61  | F   | Prim              | DHF                | 2                             | 32  | 8  | 51  | 7  | 14  | 3     | 0      | 2     | 3      |
| P348       | 46  | F   | Sec               | DF                 | 1                             | 2   | 7  | 18  | 7  | 0   | 11    | 0      | 3     | 5      |
| P355       | 58  | M   | Prim              | DF                 | 1                             | 23  | ND | ND  | 7  | 17  | 3     | 4      | 2     | 3      |
| P358       | 26  | M   | Prim              | DF                 | 11                            | 0   | 39 | 51  | 2  | 7   | 7     | 0      | 2     | 4      |
| P361       | 15  | M   | Sec               | DF                 | 2                             | 23  | 35 | 50  | 4  | 5   | 13    | 0      | 3     | 6      |
| P363       | 5   | F   | Prim              | DF                 | ND                            | ND  | 27 | 35  | 1  | 4   | 1     | 12     | 3     | 5      |
| P370       | 35  | M   | Prim              | DHF                | 23                            | 0   | 44 | 55  | 1  | 4   | 11    | 15     | 3     | 6      |
| P378       | 11  | M   | Sec               | DF                 | 23                            | 29  | 14 | 44  | 8  | 17  | 1     | 7      | 2     | 5      |
| P420       | 37  | F   | Sec               | DHF                | 1                             | 80  | 8  | 14  | 7  | 8   | 1     | 1      | 5     | ND     |
| P428       | 69  | M   | Sec               | DHF                | 2                             | 3   | 15 | 51  | 2  | 15  | 1     | 15     | 5     | 6      |
| P430       | 25  | F   | Prim              | DHF                | 2                             | 24  | 8  | 44  | 5  | 7   | 13    | 16     | ND    | ND     |
| P538       | 46  | M   | Sec               | DF                 | 23                            | 26  | ND | ND  | 4  | 7   | 9     | 12     | 3     | 0      |

**S1. Cont.**

| Patient ID | Age | Sex | Type of Infection | Clinical Diagnosis | Human Leukocyte Antigen (HLA) |     |    |     |    |     |       |        |       |        |
|------------|-----|-----|-------------------|--------------------|-------------------------------|-----|----|-----|----|-----|-------|--------|-------|--------|
|            |     |     |                   |                    | A*                            | AA* | B* | BB* | C* | CC* | DRB1* | DDRB1* | DQB1* | DDQB1* |
| P543       | 29  | F   | Sec               | DHF                | 2                             | 29  | 27 | 44  | 2  | 16  | 7     | 15     | 2     | 5      |
| P549       | 10  | F   | Sec               | DHF                | 2                             | 68  | 7  | 35  | 4  | 7   | 3     | 8      | 2     | 3      |
| P557       | 76  | F   | Sec               | DHF                | 1                             | 31  | 8  | 39  | 7  | 12  | 1     | 11     | 5     | ND     |
| P564       | 38  | F   | Prim              | DHF                | 3                             | 31  | 15 | 44  | 1  | 7   | 7     | 16     | 2     | 3      |
| P603       | 25  | F   | Prim              | DHF                | 2                             | ND  | 7  | 35  | 4  | 7   | 8     | 15     | 3     | 6      |
| P613       | 39  | F   | Prim              | DHF                | 2                             | 24  | 7  | 51  | 7  | 15  | 13    | 15     | 6     | ND     |
| P633       | 39  | F   | Prim              | DF                 | ND                            | 31  | 15 | 57  | 7  | 8   | 4     | 15     | 3     | 3      |
| P635       | 30  | F   | Prim              | DHF                | 3                             | 74  | 7  | ND  | 7  | 17  | 3     | 11     | 3     | 4      |
| P641       | 7   | F   | Prim              | DF                 | 23                            | 31  | 7  | 15  | 7  | 0   | 7     | 8      | 2     | 4      |
| P645       | 40  | F   | Sec               | DHF                | 2                             | ND  | 44 | 51  | 5  | 15  | 8     | 11     | 3     | 4      |
| P681       | 36  | F   | Prim              | DF                 | 2                             | ND  | 13 | 44  | 5  | 6   | 4     | 7      | 2     | 3      |
| P718       | 14  | M   | Prim              | DHF                | 1                             | 24  | 8  | 55  | 3  | 7   | 7     | 14     | 2     | 5      |
| P721       | 6   | M   | Prim              | DF                 | 2                             | 33  | 41 | 45  | 16 | 17  | 3     | ND     | 4     | 6      |
| P749       | 5   | M   | Sec               | DF                 | 29                            | 30  | 42 | 44  | 16 | 17  | 3     | ND     | 4     | 6      |
| P750       | 5   | F   | Prim              | DF                 | 2                             | 74  | 15 | 45  | 4  | ND  | 8     | 13     | 3     | 4      |
| P751       | 25  | F   | Prim              | DF                 | 30                            | 31  | 39 | ND  | 7  | 15  | 8     | 15     | 4     | 6      |
| P753       | 12  | F   | Sec               | DF                 | 1                             | 23  | 7  | 8   | 3  | 7   | 7     | 15     | 2     | 6      |
| P761       | 11  | F   | Sec               | DHF                | 24                            | 68  | 13 | 52  | 6  | 15  | 4     | 0      | 2     | 5      |
| P764       | 9   | F   | Prim              | DF                 | 2                             | 68  | 45 | 51  | 16 | 15  | 10    | 13     | 5     | 6      |
| P765       | 30  | F   | Sec               | DF                 | 2                             | 68  | 50 | 51  | 6  | 15  | 8     | 13     | 3     | 6      |
| P767       | 10  | M   | Sec               | DHF                | 24                            | 26  | 14 | 44  | 2  | 5   | 7     | 10     | 2     | 5      |
| P770       | 10  | M   | Prim              | DF                 | 3                             | 30  | ND | ND  | 4  | 5   | 13    | 0      | 6     | ND     |
| P775       | 12  | M   | Sec               | DF                 | 23                            | 66  | 44 | 58  | 4  | 6   | 7     | 15     | 2     | 6      |
| P776       | 7   | M   | Sec               | DF                 | 1                             | 26  | 8  | 38  | 7  | 12  | 7     | 0      | 2     | 3      |
| P778       | 7   | M   | Sec               | DF                 | 1                             | 2   | 8  | 0   | 7  | ND  | 3     | 0      | 2     | ND     |

**S1. Cont.**

| Patient ID | Age | Sex | Type of Infection | Clinical Diagnosis | Human Leukocyte Antigen (HLA) |     |    |     |    |     |       |        |       |        |
|------------|-----|-----|-------------------|--------------------|-------------------------------|-----|----|-----|----|-----|-------|--------|-------|--------|
|            |     |     |                   |                    | A*                            | AA* | B* | BB* | C* | CC* | DRB1* | DDRB1* | DQB1* | DDQB1* |
| P784       | 7   | F   | Sec               | DF                 | 2                             | 11  | 15 | 51  | 3  | 15  | 4     | 9      | 3     | 0      |
| P788       | 11  | F   | Sec               | DF                 | 2                             | 29  | 15 | 58  | 6  | 8   | 11    | 13     | 3     | 6      |
| P790       | 6   | M   | Sec               | DF                 | 24                            | 31  | 40 | 51  | 15 | 0   | 4     | 0      | 3     | 0      |
| P799       | 12  | M   | Prim              | DF                 | 2                             | 68  | 51 | ND  | 4  | 16  | 13    | 0      | 3     | 5      |
| P801       | 6   | M   | Sec               | DF                 | 2                             | 30  | 15 | 35  | 4  | 14  | 14    | 0      | 3     | 0      |
| P804       | -   | M   | Sec               | DF                 | 24                            | 31  | 39 | ND  | 3  | 7   | 4     | 8      | 3     | 4      |
| P805       | 8   | M   | Prim              | DF                 | 11                            | 25  | 7  | 18  | 7  | 12  | 15    | 16     | 5     | 6      |
| P807       | 10  | F   | Prim              | DF                 | 2                             | 29  | 51 | ND  | 4  | 14  | 8     | 13     | 4     | 6      |
| P809       | 5   | M   | Prim              | DF                 | 1                             | 11  | 13 | 57  | 6  | ND  | 7     | 0      | 2     | ND     |
| P811       | 6   | F   | Sec               | DF                 | 2                             | 24  | 27 | 58  | 7  | 0   | 4     | 7      | 2     | 3      |
| P820       | 9   | F   | Sec               | DF                 | 2                             | 3   | 48 | 51  | 4  | 15  | 1     | 4      | 3     | 5      |
| P821       | 8   | M   | Sec               | DF                 | 1                             | 2   | 8  | 14  | 7  | 8   | 1     | 7      | 2     | 5      |
| P826       | 8   | M   | Sec               | DF                 | 24                            | 34  | 18 | 44  | 5  | ND  | 3     | 4      | 2     | 3      |
| P827       | 12  | F   | Prim              | DF                 | 68                            | ND  | 14 | 40  | 3  | 8   | 1     | 0      | 5     | ND     |
| P828       | 12  | M   | Sec               | DF                 | 1                             | 2   | 15 | 58  | 3  | 4   | 13    | 0      | 3     | 6      |
| P829       | 12  | F   | Prim              | DF                 | 3                             | 29  | 7  | 13  | 6  | 7   | 1     | 9      | 2     | 5      |
| P830       | 6   | M   | Prim              | DF                 | 24                            | 68  | 8  | 51  | 7  | 16  | 7     | 0      | 2     | ND     |
| P833       | 13  | F   | Sec               | DF                 | 24                            | ND  | 8  | 50  | 6  | 7   | 7     | 13     | 2     | ND     |
| P835       | 9   | F   | Prim              | DF                 | 30                            | 31  | ND | ND  | 3  | 8   | 12    | 12     | 2     | 5      |
| P842       | 12  | M   | Sec               | DF                 | 2                             | 33  | 15 | 56  | 1  | 2   | 1     | 7      | 2     | 5      |
| P846       | 13  | M   | Sec               | DF                 | 1                             | 24  | 8  | 15  | 7  | ND  | 14    | 15     | 3     | 6      |
| P847       | 8   | M   | Sec               | DF                 | 30                            | 32  | 7  | 8   | 7  | 0   | 14    | 15     | 6     | ND     |
| P850       | 11  | M   | Sec               | DF                 | 1                             | 29  | 7  | 44  | 7  | 16  | 7     | 15     | 2     | 6      |
| P853       | 8   | F   | Sec               | DF                 | 23                            | 68  | 49 | 51  | 7  | 15  | 8     | 9      | 3     | 0      |
| P856       | 13  | F   | Sec               | DF                 | 3                             | 24  | 7  | 18  | 5  | 7   | 5     | 15     | 2     | 6      |

**S1. Cont.**

| Patient ID | Age  | Sex | Type of Infection | Clinical Diagnosis | Human Leukocyte Antigen (HLA) |     |    |     |    |     |       |        |       |        |
|------------|------|-----|-------------------|--------------------|-------------------------------|-----|----|-----|----|-----|-------|--------|-------|--------|
|            |      |     |                   |                    | A*                            | AA* | B* | BB* | C* | CC* | DRB1* | DDRB1* | DQB1* | DDQB1* |
| P861       | 8    | M   | Sec               | DHF                | 2                             | 31  | 38 | 44  | 12 | 16  | 7     | 13     | 2     | 6      |
| P862       | 13   | F   | Sec               | DHF                | 1                             | 23  | 50 | 57  | 4  | 6   | 7     | 11     | 3     | ND     |
| P863       | 8    | M   | Sec               | DHF                | 24                            | 68  | 15 | 39  | 2  | 7   | 13    | 16     | 3     | 6      |
| P864       | 10   | M   | Sec               | DHF                | 2                             | 24  | 44 | 50  | 5  | 6   | 7     | 15     | 2     | 6      |
| P865       | 3    | F   | Sec               | DHF                | 2                             | ND  | 15 | 51  | 2  | 16  | 1     | 1      | 5     | ND     |
| P866       | 3    | F   | Sec               | DHF                | 2                             | 24  | 15 | 44  | 5  | 16  | 13    | 0      | 3     | 6      |
| P869       | 0,6  | F   | Prim              | DHF                | 2                             | 29  | 50 | 78  | 6  | 16  | 3     | 13     | 2     | 6      |
| P871       | 7    | F   | Sec               | DHF                | 3                             | 68  | ND | ND  | 3  | 4   | 3     | 11     | 3     | 4      |
| P872       | 8    | F   | Sec               | DHF                | 25                            | 31  | 18 | 52  | 12 | 15  | 1     | 16     | 3     | 5      |
| P873       | 8    | F   | Sec               | DHF                | 3                             | 24  | 7  | 14  | 7  | 8   | 11    | 15     | 3     | 6      |
| P875       | 6    | F   | Sec               | DHF                | 1                             | 2   | 35 | 44  | 3  | 5   | 4     | 14     | 3     | 0      |
| P877       | 6    | M   | Sec               | DHF                | 2                             | 68  | 27 | 51  | 2  | 15  | 4     | 7      | 2     | 3      |
| P879       | 7    | F   | Sec               | DHF                | 2                             | 23  | 18 | 50  | 6  | 7   | 3     | 4      | ND    | ND     |
| P880       | 7    | F   | Sec               | DHF                | 32                            | 33  | 15 | 44  | 2  | 5   | 7     | 15     | 2     | 6      |
| P883       | 7    | M   | Sec               | DHF                | 1                             | 68  | 8  | 15  | 2  | 7   | 3     | 4      | 2     | 3      |
| P902       | 8    | M   | Prim              | DHF                | 3                             | 0   | 7  | 41  | 7  | 17  | 11    | 13     | 3     | 6      |
| P912       | 13   | F   | Sec               | DHF                | 2                             | 31  | 7  | 51  | 7  | 15  | 1     | 11     | 3     | 5      |
| P923       | 16   | M   | Sec               | DHF                | ND                            | ND  | 50 | 58  | 6  | ND  | 7     | 15     | 2     | 6      |
| P933       | -    | M   | Sec               | DHF                | 30                            | 66  | 42 | 51  | 15 | 17  | 4     | 16     | 3     | 5      |
| P934       | -    | F   | Sec               | DHF                | 3                             | 33  | 14 | 44  | 4  | 8   | 1     | 7      | 2     | 5      |
| P937       | 41   | F   | Sec               | DHF                | 2                             | 74  | 40 | 53  | 3  | 4   | 4     | 13     | 3     | 3      |
| P940       | 12   | M   | Sec               | DHF                | 29                            | 32  | 39 | 44  | 8  | 16  | 7     | 10     | 2     | 5      |
| P956       | 0,8  | M   | Sec               | DHF                | 24                            | 74  | 51 | ND  | ND | ND  | 15    | 15     | 5     | 6      |
| P961       | 0,75 | F   | Sec               | DHF                | 29                            | 66  | 44 | 51  | 15 | 16  | 4     | 4      | 3     | ND     |
| P970       | -    | F   | Sec               | DHF                | 3                             | 11  | 44 | 51  | ND | ND  | 7     | 7      | 2     | 6      |

**S1. Cont.**

| Patient ID | Age | Sex | Type of Infection | Clinical Diagnosis | Human Leukocyte Antigen (HLA) |     |    |     |    |     |       |        |       |        |
|------------|-----|-----|-------------------|--------------------|-------------------------------|-----|----|-----|----|-----|-------|--------|-------|--------|
|            |     |     |                   |                    | A*                            | AA* | B* | BB* | C* | CC* | DRB1* | DDRB1* | DQB1* | DDQB1* |
| P986       | -   | M   | Sec               | DHF                | 2                             | 3   | 8  | 15  | 7  | 16  | 16    | 16     | 2     | 3      |
| P992       | 12  | F   | Sec               | DHF                | 1                             | 11  | ND | ND  | 7  | 16  | 7     | 15     | 2     | 6      |
| P1036      | 4   | M   | Sec               | DHF                | 2                             | 23  | 45 | 50  | 6  | 16  | 7     | 13     | 2     | 6      |
| P1046      | -   | M   | Sec               | DHF                | 33                            | 66  | 18 | ND  | 2  | 6   | 4     | 7      | 2     | 3      |
| P1053      | -   | M   | Sec               | DHF                | 23                            | 30  | 15 | 50  | 2  | 4   | 7     | 11     | 2     | 3      |
| P1064      | -   | M   | Sec               | DHF                | 2                             | 26  | ND | ND  | 7  | ND  | 4     | 7      | 3     | 0      |
| P1065      | -   | F   | Sec               | DHF                | 2                             | 32  | 7  | 15  | 3  | 7   | 16    | 16     | 5     | ND     |
| P1108      | -   | M   | Sec               | DHF                | 23                            | ND  | 7  | 44  | 4  | 7   | 7     | 15     | 2     | 6      |
| P1110      | -   | F   | Sec               | DHF                | 2                             | ND  | 44 | 53  | 4  | ND  | 13    | 0      | 2     | 3      |
| P1123      | -   | M   | Prim              | DHF                | 3                             | 26  | 27 | ND  | 2  | 2   | ND    | ND     | ND    | ND     |
| P1131      | -   | F   | Sec               | DHF                | 24                            | 74  | ND | ND  | 7  | 16  | ND    | ND     | ND    | ND     |
| P1147      | -   | F   | Sec               | DHF                | 2                             | 33  | 15 | 56  | 14 | ND  | 1     | 8      | 4     | 5      |

-, unknown; F, female; M, male; Prim, primary infection; Sec, secondary infection; DF, dengue fever; DHF, dengue hemorrhagic fever; ND, no defined.
